# Supplementary material
Source: PubMed Central journal article supplement (PMC6395165)

# Guideline-Based Physical Activity and Survival Among US Men With Nonmetastatic Prostate Cancer

Barbra A. Dickerman, Edward Giovannucci, Claire H. Parnar, Lorelei A. Mucci, and Miguel A. Hernán

## TABLE OF CONTENTS

|                                                                                                                                                                                                     |    |
|-----------------------------------------------------------------------------------------------------------------------------------------------------------------------------------------------------|----|
| <b>Web Appendix 1</b> The parametric g-formula .....                                                                                                                                                | 2  |
| <b>Web Appendix 2</b> Models used for the parametric g-formula .....                                                                                                                                | 4  |
| <b>Web Table 1</b> Specification and emulation of the target trial.....                                                                                                                             | 11 |
| <b>Web Table 2</b> Covariates .....                                                                                                                                                                 | 12 |
| <b>Web Table 3</b> Cumulative and average percent of men intervened on .....                                                                                                                        | 14 |
| <b>Web Table 4</b> P-values for results in Main Table 2 per request of one reviewer and the editor .....                                                                                            | 16 |
| <b>Web Table 5</b> P-values for results in Main Table 3 per request of one reviewer and the editor .....                                                                                            | 17 |
| <b>Web Table 6</b> Estimated survival time and time invested in physical activity .....                                                                                                             | 18 |
| <b>Web Table 7</b> Negative outcome control .....                                                                                                                                                   | 19 |
| <b>Web Table 8</b> Assuming that the development of functional impairment, metastasis, and chronic diseases occurred 2 years before the questionnaire in which these conditions were reported ..... | 20 |
| <b>Web Table 9</b> Keeping the total time devoted to vigorous and moderate activity constant ..                                                                                                     | 21 |
| <b>Web Table 10</b> Imposing a two-year lag time .....                                                                                                                                              | 22 |
| <b>Web Table 11</b> Pooled logistic regression .....                                                                                                                                                | 23 |
| <b>Web Table 12</b> Estimated risk ratios with risk under low activity as the reference .....                                                                                                       | 24 |
| <b>Web Figures 1-4</b> Mean difference between observed vs. simulated (under no intervention) values of time-varying covariates by year of follow-up.....                                           | 25 |

## Web Appendix 1

The g-formula risk is a weighted average of risks conditional on a specified intervention history and observed confounder history. The weights are the probability density functions of the time-varying confounders, which are estimated using parametric regression models, and the weighted average is approximated using Monte Carlo simulation (of 10,000 men in our analyses). The adjustment covariates are described in **Web Table 2**.

To assess model misspecification, we compared the observed means of time-varying covariates with the model-based predicted means under no intervention (**Web Figures 1-4**). The estimated 10-year risk of death under no physical activity intervention was the same as the observed risk (15.4%), a necessary condition for no model misspecification, and the estimated and observed means of all time-varying covariates were close.

To assess the possibility of model extrapolation, we calculated the proportion of men who had to increase their activity at any point during follow-up and during each two-year period on average in order to keep adhering to the strategy (**Web Table 3**). The cumulative proportion of men who would have to change their behavior at any point over follow-up to keep adhering to the strategies was below 100% for all interventions. When we expanded the set of chronic conditions that would excuse men from following the recommended physical activity levels, the proportion of men who had to change their behavior at any time over follow-up to remain adherent to these strategies decreased, as expected.

Additionally, we estimated risk ratios with risk under low activity (<1.25 hours/week of vigorous or <2.5 hours/week of moderate) as the reference (**Web Table 12**). For comparison with a conventional approach, we fit pooled logistic models to estimate the association between physical activity and risk of death in two-year intervals (**Web Table 11**). As expected, estimated risk ratios were further from the null when risk under low physical activity was used as the reference rather than risk under no physical activity intervention (**Web Table 12** compared with

**Main Table 2**). Estimates from conventional pooled logistic models were qualitatively similar to these estimates, but further from the null (**Web Table 11** compared with **Web Table 12**).

As one of our sensitivity analyses for unmeasured confounding, we conducted an alternative analysis in which physical activity and covariate data are lagged by two years. This approach assumes (1) a two year lag between physical activity and its potential effects on chronic diseases and mortality, (2) any diagnosed chronic disease existed in a subclinical state for two years, and (3) any undiagnosed chronic disease would have been diagnosed by two years.

## Web Appendix 2

### Models used for the parametric g-formula

#### Model 1 Outcome model

##### The LOGISTIC Procedure

###### Model Information

|                           |                  |
|---------------------------|------------------|
| Data Set                  | WORK.PARAM       |
| Response Variable         | event            |
| Number of Response Levels | 2                |
| Weight Variable           | _weight_         |
| Model                     | binary logit     |
| Optimization Technique    | Fisher's scoring |

|                             |      |
|-----------------------------|------|
| Number of Observations Read | 9119 |
| Number of Observations Used | 8972 |
| Sum of Weights Read         | 9119 |
| Sum of Weights Used         | 8972 |

###### Response Profile

| Ordered Value | event | Total Frequency | Total Weight |
|---------------|-------|-----------------|--------------|
| 1             | 1     | 250             | 250.0000     |
| 2             | 0     | 8722            | 8722.0000    |

Probability modeled is event=1.

###### Model Convergence Status

Convergence criterion (GCONV=1E-8) satisfied.

###### Analysis of Maximum Likelihood Estimates

| Parameter    | DF | Estimate | Standard Error | Wald Chi-Square | Pr > ChiSq |
|--------------|----|----------|----------------|-----------------|------------|
| Intercept    | 1  | -1.5533  | 0.5177         | 9.0033          | 0.0027     |
| baseage_1    | 1  | -0.6195  | 0.2340         | 7.0103          | 0.0081     |
| baseage_2    | 1  | -0.5315  | 0.2091         | 6.4595          | 0.0110     |
| baseage_3    | 1  | -0.2737  | 0.1713         | 2.5513          | 0.1102     |
| smkhx        | 1  | 0.0519   | 0.1377         | 0.1419          | 0.7064     |
| treat_1      | 1  | -0.6531  | 0.2308         | 8.0095          | 0.0047     |
| treat_2      | 1  | -0.1870  | 0.2036         | 0.8438          | 0.3583     |
| stage_1      | 1  | -0.0711  | 0.1473         | 0.2328          | 0.6295     |
| psa_1        | 1  | 0.1947   | 0.2119         | 0.8439          | 0.3583     |
| gleason_1    | 1  | -0.8889  | 0.2079         | 18.2833         | <.0001     |
| gleason_2    | 1  | -0.3619  | 0.2156         | 2.8191          | 0.0931     |
| bmi_pre_1    | 1  | -0.4894  | 1.1816         | 0.1715          | 0.6788     |
| bmi_pre_2    | 1  | 0.1708   | 0.3975         | 0.1845          | 0.6675     |
| bmi_pre_3    | 1  | 0.5384   | 0.3666         | 2.1571          | 0.1419     |
| vigact_pre_1 | 1  | 0.1136   | 0.2333         | 0.2372          | 0.6263     |
| vigact_pre_2 | 1  | -0.0524  | 0.3215         | 0.0266          | 0.8706     |

|               |   |         |        |         |        |
|---------------|---|---------|--------|---------|--------|
| vigact_pre_3  | 1 | 0.3216  | 0.2661 | 1.4613  | 0.2267 |
| modact_pre_1  | 1 | -0.2790 | 0.1871 | 2.2227  | 0.1360 |
| modact_pre_2  | 1 | 0.0895  | 0.1929 | 0.2153  | 0.6427 |
| modact_pre_3  | 1 | -0.3047 | 0.2209 | 1.9030  | 0.1677 |
| fhxmi         | 1 | -0.4512 | 0.2314 | 3.8022  | 0.0512 |
| period_1      | 1 | -1.9668 | 0.2933 | 44.9689 | <.0001 |
| period_2      | 1 | -1.0941 | 0.2092 | 27.3642 | <.0001 |
| period_3      | 1 | -0.7179 | 0.1933 | 13.7946 | 0.0002 |
| period_4      | 1 | -0.6624 | 0.1952 | 11.5154 | 0.0007 |
| xcond         | 1 | 1.3141  | 0.2703 | 23.6344 | <.0001 |
| tsxcond_inter | 1 | -0.1149 | 0.1256 | 0.8378  | 0.3600 |
| modact        | 1 | -0.2250 | 0.0428 | 27.5893 | <.0001 |
| modact_spl1   | 1 | 0.1548  | 0.0327 | 22.3509 | <.0001 |
| bmi_1         | 1 | 1.8081  | 0.6642 | 7.4107  | 0.0065 |
| bmi_2         | 1 | 0.7712  | 0.3792 | 4.1365  | 0.0420 |
| bmi_3         | 1 | 0.2690  | 0.3557 | 0.5718  | 0.4496 |
| vigact        | 1 | -0.2727 | 0.0983 | 7.7001  | 0.0055 |
| vigact_spl1   | 1 | 0.1708  | 0.0924 | 3.4156  | 0.0646 |

**Model 2** Development of conditions limiting physical activity model (composite of functional impairment, metastasis, myocardial infarction, stroke, congestive heart failure, or amyotrophic lateral sclerosis)

The LOGISTIC Procedure

Model Information

|                           |                  |
|---------------------------|------------------|
| Data Set                  | WORK.PARAM       |
| Response Variable         | xcond            |
| Number of Response Levels | 2                |
| Weight Variable           | _weight_         |
| Model                     | binary logit     |
| Optimization Technique    | Fisher's scoring |

|                             |      |
|-----------------------------|------|
| Number of Observations Read | 6396 |
| Number of Observations Used | 6396 |
| Sum of Weights Read         | 6396 |
| Sum of Weights Used         | 6396 |

Response Profile

| Ordered Value | xcond | Total Frequency | Total Weight |
|---------------|-------|-----------------|--------------|
| 1             | 1     | 400             | 400.0000     |
| 2             | 0     | 5996            | 5996.0000    |

Probability modeled is xcond=1.

Model Convergence Status

Convergence criterion (GCONV=1E-8) satisfied.

Analysis of Maximum Likelihood Estimates

|  | Standard | Wald |
|--|----------|------|
|--|----------|------|

| Parameter      | DF | Estimate | Error  | Chi-Square | Pr > ChiSq |
|----------------|----|----------|--------|------------|------------|
| Intercept      | 1  | -0.0539  | 0.3834 | 0.0198     | 0.8881     |
| baseage_1      | 1  | -1.2596  | 0.1870 | 45.3840    | <.0001     |
| baseage_2      | 1  | -0.5674  | 0.1555 | 13.3161    | 0.0003     |
| baseage_3      | 1  | -0.3398  | 0.1379 | 6.0743     | 0.0137     |
| smkhx          | 1  | 0.0342   | 0.1082 | 0.1001     | 0.7517     |
| treat_1        | 1  | -0.5107  | 0.1838 | 7.7207     | 0.0055     |
| treat_2        | 1  | -0.1951  | 0.1670 | 1.3642     | 0.2428     |
| stage_1        | 1  | -0.2366  | 0.1162 | 4.1433     | 0.0418     |
| psa_1          | 1  | -0.3521  | 0.1759 | 4.0052     | 0.0454     |
| gleason_1      | 1  | -0.6022  | 0.1659 | 13.1855    | 0.0003     |
| gleason_2      | 1  | -0.3454  | 0.1784 | 3.7464     | 0.0529     |
| bmi_pre_1      | 1  | -1.5383  | 1.1149 | 1.9038     | 0.1677     |
| bmi_pre_2      | 1  | -0.0499  | 0.2744 | 0.0331     | 0.8556     |
| bmi_pre_3      | 1  | -0.1727  | 0.2348 | 0.5411     | 0.4620     |
| vigact_pre_1   | 1  | -0.0748  | 0.1852 | 0.1633     | 0.6861     |
| vigact_pre_2   | 1  | -0.00800 | 0.2359 | 0.0011     | 0.9729     |
| vigact_pre_3   | 1  | 0.1594   | 0.2034 | 0.6137     | 0.4334     |
| modact_pre_1   | 1  | 0.1080   | 0.1544 | 0.4888     | 0.4845     |
| modact_pre_2   | 1  | 0.2414   | 0.1619 | 2.2237     | 0.1359     |
| modact_pre_3   | 1  | 0.0816   | 0.1659 | 0.2421     | 0.6227     |
| fhxmi          | 1  | 0.2013   | 0.1538 | 1.7128     | 0.1906     |
| period_1       | 0  | 0        | .      | .          | .          |
| period_2       | 1  | -0.3085  | 0.1547 | 3.9758     | 0.0462     |
| period_3       | 1  | -0.3899  | 0.1631 | 5.7158     | 0.0168     |
| period_4       | 1  | -0.3082  | 0.1736 | 3.1541     | 0.0757     |
| modact_ll      | 1  | -0.0839  | 0.0360 | 5.4254     | 0.0198     |
| modact_ll_spl1 | 1  | 0.0492   | 0.0272 | 3.2752     | 0.0703     |
| bmi_ll_1       | 1  | 0.6708   | 0.6371 | 1.1086     | 0.2924     |
| bmi_ll_2       | 1  | -0.6886  | 0.2674 | 6.6323     | 0.0100     |
| bmi_ll_3       | 1  | -0.3326  | 0.2242 | 2.2013     | 0.1379     |
| vigact_ll      | 1  | -0.1384  | 0.0718 | 3.7121     | 0.0540     |
| vigact_ll_spl1 | 1  | 0.0617   | 0.0661 | 0.8690     | 0.3512     |

### Model 3 Moderate activity model

The REG Procedure  
Model: MODEL1  
Dependent Variable: modact

Number of Observations Read 6820  
Number of Observations Used 6820

Root MSE 6.58707 R-Square 0.3772  
Dependent Mean 7.65784 Adj R-Sq 0.3743  
Coeff Var 86.01741

#### Parameter Estimates

| Variable  | DF | Parameter Estimate | Standard Error | t Value | Pr >  t |
|-----------|----|--------------------|----------------|---------|---------|
| Intercept | 1  | 2.69012            | 0.66876        | 4.02    | <.0001  |
| baseage_1 | 1  | 0.85723            | 0.26537        | 3.23    | 0.0012  |
| baseage_2 | 1  | 1.05468            | 0.25775        | 4.09    | <.0001  |
| baseage_3 | 1  | 0.64540            | 0.24380        | 2.65    | 0.0081  |
| smkhx     | 1  | -0.06564           | 0.16264        | -0.40   | 0.6865  |

|                |   |          |         |        |        |
|----------------|---|----------|---------|--------|--------|
| treat_1        | 1 | 0.10728  | 0.30874 | 0.35   | 0.7283 |
| treat_2        | 1 | -0.26481 | 0.30093 | -0.88  | 0.3789 |
| stage_1        | 1 | 0.04409  | 0.18358 | 0.24   | 0.8102 |
| psa_1          | 1 | 0.08472  | 0.23860 | 0.36   | 0.7225 |
| gleason_1      | 1 | 0.33983  | 0.31133 | 1.09   | 0.2751 |
| gleason_2      | 1 | 0.40371  | 0.33265 | 1.21   | 0.2249 |
| bmi_pre_1      | 1 | -2.37861 | 1.35111 | -1.76  | 0.0784 |
| bmi_pre_2      | 1 | -0.38232 | 0.44223 | -0.86  | 0.3873 |
| bmi_pre_3      | 1 | -0.14650 | 0.38320 | -0.38  | 0.7022 |
| vigact_pre_1   | 1 | -0.24552 | 0.26788 | -0.92  | 0.3594 |
| vigact_pre_2   | 1 | -0.49579 | 0.33759 | -1.47  | 0.1420 |
| vigact_pre_3   | 1 | 0.01401  | 0.29942 | 0.05   | 0.9627 |
| modact_pre_1   | 1 | -2.72369 | 0.23121 | -11.78 | <.0001 |
| modact_pre_2   | 1 | -2.37572 | 0.24071 | -9.87  | <.0001 |
| modact_pre_3   | 1 | -1.40199 | 0.24593 | -5.70  | <.0001 |
| fhxmi          | 1 | 0.43595  | 0.24342 | 1.79   | 0.0733 |
| period_1       | 0 | 0        | .       | .      | .      |
| period_2       | 1 | 0.72158  | 0.24967 | 2.89   | 0.0039 |
| period_3       | 1 | 0.71701  | 0.25250 | 2.84   | 0.0045 |
| period_4       | 1 | 0.29881  | 0.26149 | 1.14   | 0.2532 |
| xcond          | 1 | -0.78575 | 0.51009 | -1.54  | 0.1235 |
| tsxcond_inter  | 1 | 0.08094  | 0.24691 | 0.33   | 0.7431 |
| modact_ll      | 1 | 0.80444  | 0.05676 | 14.17  | <.0001 |
| modact_ll_spl1 | 1 | -0.19971 | 0.04197 | -4.76  | <.0001 |
| bmi_ll_1       | 1 | 4.32035  | 1.37096 | 3.15   | 0.0016 |
| bmi_ll_2       | 1 | 0.84932  | 0.42325 | 2.01   | 0.0448 |
| bmi_ll_3       | 1 | 0.63631  | 0.36352 | 1.75   | 0.0801 |
| vigact_ll      | 1 | -0.10662 | 0.10294 | -1.04  | 0.3004 |
| vigact_ll_spl1 | 1 | 0.07749  | 0.08853 | 0.88   | 0.3814 |

#### Model 4 BMI model

The REG Procedure  
Model: MODEL1  
Dependent Variable: bmi

Number of Observations Read 6820  
Number of Observations Used 6820

Root MSE 0.06711 R-Square 0.7217  
Dependent Mean 3.24274 Adj R-Sq 0.7203  
Coeff Var 2.06948

#### Parameter Estimates

| Variable  | DF | Parameter Estimate | Standard Error | t Value | Pr >  t |
|-----------|----|--------------------|----------------|---------|---------|
| Intercept | 1  | 3.46142            | 0.00687        | 503.79  | <.0001  |
| baseage_1 | 1  | 0.01699            | 0.00271        | 6.27    | <.0001  |
| baseage_2 | 1  | 0.01693            | 0.00263        | 6.43    | <.0001  |
| baseage_3 | 1  | 0.00810            | 0.00249        | 3.26    | 0.0011  |
| smkhx     | 1  | 0.00309            | 0.00166        | 1.86    | 0.0625  |
| treat_1   | 1  | 0.00411            | 0.00315        | 1.31    | 0.1913  |
| treat_2   | 1  | 0.00132            | 0.00307        | 0.43    | 0.6675  |
| stage_1   | 1  | -0.00279           | 0.00187        | -1.49   | 0.1354  |
| psa_1     | 1  | -0.00291           | 0.00243        | -1.20   | 0.2307  |
| gleason_1 | 1  | -0.00258           | 0.00317        | -0.81   | 0.4153  |

|                |   |             |            |        |        |
|----------------|---|-------------|------------|--------|--------|
| gleason_2      | 1 | -0.00532    | 0.00339    | -1.57  | 0.1166 |
| bmi_pre_1      | 1 | -0.13960    | 0.01377    | -10.14 | <.0001 |
| bmi_pre_2      | 1 | -0.11586    | 0.00451    | -25.71 | <.0001 |
| bmi_pre_3      | 1 | -0.05476    | 0.00390    | -14.03 | <.0001 |
| vigact_pre_1   | 1 | 0.00198     | 0.00273    | 0.73   | 0.4674 |
| vigact_pre_2   | 1 | 0.00270     | 0.00344    | 0.79   | 0.4320 |
| vigact_pre_3   | 1 | 0.00167     | 0.00305    | 0.55   | 0.5844 |
| modact_pre_1   | 1 | 0.00249     | 0.00239    | 1.04   | 0.2967 |
| modact_pre_2   | 1 | 0.00261     | 0.00247    | 1.06   | 0.2904 |
| modact_pre_3   | 1 | 0.00085917  | 0.00251    | 0.34   | 0.7323 |
| fhxmi          | 1 | -0.00353    | 0.00248    | -1.42  | 0.1547 |
| period_1       | 0 | 0           | .          | .      | .      |
| period_2       | 1 | 0.00642     | 0.00255    | 2.52   | 0.0117 |
| period_3       | 1 | 0.00291     | 0.00258    | 1.13   | 0.2584 |
| period_4       | 1 | 0.00144     | 0.00266    | 0.54   | 0.5893 |
| xcond          | 1 | -0.00474    | 0.00521    | -0.91  | 0.3626 |
| tsxcond_inter  | 1 | 0.00171     | 0.00252    | 0.68   | 0.4977 |
| modact_ll      | 1 | 0.00020698  | 0.00064776 | 0.32   | 0.7493 |
| modact_ll_spl1 | 1 | -0.00006509 | 0.00047249 | -0.14  | 0.8904 |
| bmi_ll_1       | 1 | -0.38170    | 0.01398    | -27.31 | <.0001 |
| bmi_ll_2       | 1 | -0.22560    | 0.00431    | -52.30 | <.0001 |
| bmi_ll_3       | 1 | -0.12555    | 0.00370    | -33.89 | <.0001 |
| vigact_ll      | 1 | -0.00171    | 0.00105    | -1.63  | 0.1027 |
| vigact_ll_spl1 | 1 | 0.00096989  | 0.00090280 | 1.07   | 0.2827 |
| modact         | 1 | -0.00045448 | 0.00062425 | -0.73  | 0.4666 |
| modact_spl1    | 1 | 0.00000458  | 0.00045730 | 0.01   | 0.9920 |

## Model 5 Vigorous activity models

The LOGISTIC Procedure

### Model Information

|                           |                  |
|---------------------------|------------------|
| Data Set                  | WORK.PARAM       |
| Response Variable         | zvigact          |
| Number of Response Levels | 2                |
| Weight Variable           | _weight_         |
| Model                     | binary logit     |
| Optimization Technique    | Fisher's scoring |

|                             |      |
|-----------------------------|------|
| Number of Observations Read | 6820 |
| Number of Observations Used | 6820 |
| Sum of Weights Read         | 6820 |
| Sum of Weights Used         | 6820 |

### Response Profile

| Ordered Value | zvigact | Total Frequency | Total Weight |
|---------------|---------|-----------------|--------------|
| 1             | 1       | 3594            | 3594.0000    |
| 2             | 0       | 3226            | 3226.0000    |

Probability modeled is zvigact=1.

### Model Convergence Status

Convergence criterion (GCONV=1E-8) satisfied.



Analysis of Maximum Likelihood Estimates

| Parameter      | DF | Estimate | Standard Error | Wald Chi-Square | Pr > ChiSq |
|----------------|----|----------|----------------|-----------------|------------|
| Intercept      | 1  | -0.8979  | 0.2548         | 12.4194         | 0.0004     |
| baseage_1      | 1  | 0.1565   | 0.1006         | 2.4190          | 0.1199     |
| baseage_2      | 1  | 0.0774   | 0.0974         | 0.6321          | 0.4266     |
| baseage_3      | 1  | -0.0756  | 0.0918         | 0.6779          | 0.4103     |
| smkx           | 1  | -0.0188  | 0.0617         | 0.0927          | 0.7608     |
| treat_1        | 1  | -0.00515 | 0.1156         | 0.0020          | 0.9645     |
| treat_2        | 1  | -0.0266  | 0.1123         | 0.0561          | 0.8128     |
| stage_1        | 1  | -0.0332  | 0.0698         | 0.2260          | 0.6345     |
| psa_1          | 1  | 0.2505   | 0.0903         | 7.7006          | 0.0055     |
| gleason_1      | 1  | -0.0630  | 0.1171         | 0.2898          | 0.5904     |
| gleason_2      | 1  | -0.1946  | 0.1255         | 2.4032          | 0.1211     |
| bmi_pre_1      | 1  | -0.2860  | 0.5337         | 0.2871          | 0.5921     |
| bmi_pre_2      | 1  | 0.1477   | 0.1717         | 0.7401          | 0.3896     |
| bmi_pre_3      | 1  | 0.0553   | 0.1474         | 0.1408          | 0.7075     |
| vigact_pre_1   | 1  | -0.7733  | 0.1074         | 51.8625         | <.0001     |
| vigact_pre_2   | 1  | -0.1523  | 0.1354         | 1.2659          | 0.2605     |
| vigact_pre_3   | 1  | -0.1665  | 0.1286         | 1.6761          | 0.1954     |
| modact_pre_1   | 1  | 0.00604  | 0.0886         | 0.0047          | 0.9456     |
| modact_pre_2   | 1  | 0.1338   | 0.0924         | 2.0959          | 0.1477     |
| modact_pre_3   | 1  | 0.0476   | 0.0934         | 0.2594          | 0.6105     |
| fhxmi          | 1  | 0.00232  | 0.0921         | 0.0006          | 0.9799     |
| period_1       | 0  | 0        | .              | .               | .          |
| period_2       | 1  | 0.2977   | 0.0950         | 9.8205          | 0.0017     |
| period_3       | 1  | 0.2448   | 0.0956         | 6.5549          | 0.0105     |
| period_4       | 1  | 0.1821   | 0.0988         | 3.3964          | 0.0653     |
| xcond          | 1  | -0.3196  | 0.1911         | 2.7962          | 0.0945     |
| tsxcond_inter  | 1  | 0.1810   | 0.0917         | 3.8987          | 0.0483     |
| modact_ll      | 1  | -0.0380  | 0.0239         | 2.5280          | 0.1118     |
| modact_ll_spl1 | 1  | 0.0157   | 0.0175         | 0.8104          | 0.3680     |
| bmi_ll_1       | 1  | 1.4904   | 0.6114         | 5.9429          | 0.0148     |
| bmi_ll_2       | 1  | 0.1136   | 0.2023         | 0.3154          | 0.5744     |
| bmi_ll_3       | 1  | -0.0419  | 0.1718         | 0.0594          | 0.8075     |
| vigact_ll      | 1  | 1.2295   | 0.0415         | 876.5002        | <.0001     |
| vigact_ll_spl1 | 1  | -0.8123  | 0.0396         | 420.3715        | <.0001     |
| modact         | 1  | 0.0509   | 0.0231         | 4.8470          | 0.0277     |
| modact_spl1    | 1  | -0.0337  | 0.0169         | 3.9518          | 0.0468     |
| bmi_1          | 1  | -0.0613  | 0.5185         | 0.0140          | 0.9058     |
| bmi_2          | 1  | 0.2039   | 0.1955         | 1.0883          | 0.2969     |
| bmi_3          | 1  | 0.2138   | 0.1683         | 1.6138          | 0.2040     |

The REG Procedure  
 Model: MODEL1  
 Dependent Variable: lvigact

Number of Observations Read 3594  
 Number of Observations Used 3594

Root MSE 0.93504 R-Square 0.3856  
 Dependent Mean 0.57080 Adj R-Sq 0.3792  
 Coeff Var 163.81224

Parameter Estimates

| Variable       | DF | Parameter Estimate | Standard Error | t Value | Pr >  t |
|----------------|----|--------------------|----------------|---------|---------|
| Intercept      | 1  | 0.01801            | 0.13927        | 0.13    | 0.8971  |
| baseage_1      | 1  | 0.05323            | 0.05262        | 1.01    | 0.3118  |
| baseage_2      | 1  | -0.06046           | 0.05137        | -1.18   | 0.2393  |
| baseage_3      | 1  | -0.08028           | 0.04942        | -1.62   | 0.1044  |
| smkhx          | 1  | -0.04550           | 0.03186        | -1.43   | 0.1534  |
| treat_1        | 1  | 0.01993            | 0.06121        | 0.33    | 0.7447  |
| treat_2        | 1  | 0.03587            | 0.06006        | 0.60    | 0.5504  |
| stage_1        | 1  | -0.03920           | 0.03606        | -1.09   | 0.2772  |
| psa_1          | 1  | -0.02066           | 0.04506        | -0.46   | 0.6466  |
| gleason_1      | 1  | -0.03649           | 0.06097        | -0.60   | 0.5495  |
| gleason_2      | 1  | -0.03803           | 0.06581        | -0.58   | 0.5634  |
| bmi_pre_1      | 1  | 0.65415            | 0.26096        | 2.51    | 0.0122  |
| bmi_pre_2      | 1  | 0.07576            | 0.09952        | 0.76    | 0.4466  |
| bmi_pre_3      | 1  | -0.09356           | 0.08887        | -1.05   | 0.2925  |
| vigact_pre_1   | 1  | -0.54831           | 0.04670        | -11.74  | <.0001  |
| vigact_pre_2   | 1  | -0.43617           | 0.05714        | -7.63   | <.0001  |
| vigact_pre_3   | 1  | -0.25045           | 0.04858        | -5.16   | <.0001  |
| modact_pre_1   | 1  | 0.05254            | 0.04731        | 1.11    | 0.2668  |
| modact_pre_2   | 1  | 0.07600            | 0.04718        | 1.61    | 0.1073  |
| modact_pre_3   | 1  | 0.06920            | 0.04885        | 1.42    | 0.1567  |
| fhxmi          | 1  | -0.04421           | 0.04746        | -0.93   | 0.3517  |
| period_1       | 0  | 0                  | .              | .       | .       |
| period_2       | 1  | 0.00246            | 0.04991        | 0.05    | 0.9607  |
| period_3       | 1  | 0.00178            | 0.05066        | 0.04    | 0.9719  |
| period_4       | 1  | -0.01600           | 0.05274        | -0.30   | 0.7617  |
| xcond          | 1  | 0.10218            | 0.10863        | 0.94    | 0.3470  |
| tsxcond_inter  | 1  | -0.07787           | 0.05163        | -1.51   | 0.1316  |
| modact_l1      | 1  | -0.04593           | 0.01291        | -3.56   | 0.0004  |
| modact_l1_spl1 | 1  | 0.02445            | 0.00940        | 2.60    | 0.0093  |
| bmi_l1_1       | 1  | -1.14109           | 0.28188        | -4.05   | <.0001  |
| bmi_l1_2       | 1  | -0.25861           | 0.12082        | -2.14   | 0.0324  |
| bmi_l1_3       | 1  | -0.16659           | 0.10718        | -1.55   | 0.1202  |
| vigact_l1      | 1  | 0.39058            | 0.02040        | 19.15   | <.0001  |
| vigact_l1_spl1 | 1  | -0.19963           | 0.01638        | -12.19  | <.0001  |
| modact         | 1  | 0.08140            | 0.01253        | 6.50    | <.0001  |
| modact_spl1    | 1  | -0.04302           | 0.00915        | -4.70   | <.0001  |
| bmi_1          | 1  | -0.22004           | 0.26131        | -0.84   | 0.3998  |
| bmi_2          | 1  | 0.23400            | 0.11383        | 2.06    | 0.0399  |
| bmi_3          | 1  | 0.29331            | 0.10126        | 2.90    | 0.0038  |

**Web Table 1.** Specification and Emulation of a Target Trial of Physical Activity Interventions Among Men With Nonmetastatic Prostate Cancer Using Data From the Health Professionals Follow-up Study

| <b>Component</b>            | <b>Target trial</b>                                                                                                                                                                                                                                                                                                                       | <b>Emulation using observational data</b>                                                                     |
|-----------------------------|-------------------------------------------------------------------------------------------------------------------------------------------------------------------------------------------------------------------------------------------------------------------------------------------------------------------------------------------|---------------------------------------------------------------------------------------------------------------|
| Aim                         | To estimate the effect of physical activity interventions on 10-year risk of mortality among U.S. men aged 50-80 years and diagnosed with nonmetastatic prostate cancer.                                                                                                                                                                  | Same.                                                                                                         |
| Eligibility criteria        | Men aged 50-80 years diagnosed with nonmetastatic prostate cancer between Jan 1998 and Jan 2010. Exclusion criteria of recent cardiovascular event (myocardial infarction or stroke), congestive heart failure, amyotrophic lateral sclerosis, or functional impairment (difficulty climbing a flight of stairs or walking eight blocks). | Same.                                                                                                         |
| Treatment strategies        | Initiate physical activity intervention at diagnosis and continue it over follow-up until the development of metastasis or a condition or disease limiting physical ability, including myocardial infarction, stroke, congestive heart failure, amyotrophic lateral sclerosis, or functional impairment.                                  | Same, except baseline is taken as the return date of the first questionnaire after prostate cancer diagnosis. |
| Treatment assignment        | At diagnosis, men assigned to a strategy and will be aware of the strategy to which they have been assigned.                                                                                                                                                                                                                              | Same.                                                                                                         |
| Follow-up                   | Starts at diagnosis and ends at death, loss to follow-up, 10 years after baseline, or on 1 June 2014, whichever occurs first.                                                                                                                                                                                                             | Same, except baseline is taken as the return date of the first questionnaire after prostate cancer diagnosis. |
| Outcome                     | All-cause mortality within 10 years of diagnosis.                                                                                                                                                                                                                                                                                         | Same.                                                                                                         |
| Causal contrast of interest | Intention-to-treat effect, <i>i.e.</i> , effect of being assigned to a physical activity strategy vs. no strategy at baseline. Per-protocol effect, <i>i.e.</i> , effect that would have been observed if all men adhered to their assigned strategy over the 10-year follow-up.                                                          | Observational analog of per-protocol effect.                                                                  |
| Statistical analysis        | Intention-to-treat analysis.<br>Per-protocol analysis: comparison of 10-year risk of death between groups receiving each treatment strategy with adjustment for pre- and post-baseline prognostic factors associated with adherence to the treatment strategies and loss to follow-up.                                                    | Same as per-protocol analysis.                                                                                |

**Web Table 2.** Covariates Used to Model 10-Year Risk of All-Cause Mortality Among Men With Nonmetastatic Prostate Cancer, Health Professionals Follow-Up Study.

| <b>A. Time-fixed covariates</b>                                      | <b>Functional form as predictor</b> | <b>Variable name</b> | <b>Categories</b>                 |
|----------------------------------------------------------------------|-------------------------------------|----------------------|-----------------------------------|
| <b>Baseline</b> (assessed in first post-diagnostic questionnaire)    |                                     |                      |                                   |
| Age                                                                  | 4 categories                        | baseage_1            | <65 years                         |
|                                                                      |                                     | baseage_2            | 65-69.9 years                     |
|                                                                      |                                     | baseage_3            | 70-74.9 years                     |
|                                                                      |                                     | baseage_4            | ≥75 years                         |
| Clinical stage at diagnosis                                          | 2 categories                        | stage_1              | T1                                |
|                                                                      |                                     | stage_2              | T2, T3, T4, N1/M0                 |
| Prostate-specific antigen level at diagnosis                         | 2 categories                        | psa_1                | <4 ng/mL                          |
|                                                                      |                                     | psa_2                | ≥4 ng/mL                          |
| Gleason grade at diagnosis                                           | 3 categories                        | gleason_1            | <7                                |
|                                                                      |                                     | gleason_2            | 7                                 |
|                                                                      |                                     | gleason_3            | >7                                |
| Primary treatment                                                    | 3 categories                        | treat_1              | Radical prostatectomy             |
|                                                                      |                                     | treat_2              | Radiation                         |
|                                                                      |                                     | treat_3              | Hormones, watchful waiting, other |
| Parental history of myocardial infarction before age 60              | Indicator                           | fhxmi                | Yes/No                            |
| <b>Pre-baseline</b> (assessed in first pre-diagnostic questionnaire) |                                     |                      |                                   |
| BMI                                                                  | 4 categories                        | bmi_pre_1            | <18.5 kg/m <sup>2</sup>           |
|                                                                      |                                     | bmi_pre_2            | 18.5-24.9 kg/m <sup>2</sup>       |
|                                                                      |                                     | bmi_pre_3            | 25.0-29.9 kg/m <sup>2</sup>       |
|                                                                      |                                     | bmi_pre_4            | ≥30 kg/m <sup>2</sup>             |
| Vigorous physical activity                                           | 4 categories                        | vigact_pre_1         | <1.25 hour/week                   |
|                                                                      |                                     | vigact_pre_2         | 1.25-2.49 hours/week              |
|                                                                      |                                     | vigact_pre_3         | 2.50-3.74 hours/week              |
|                                                                      |                                     | vigact_pre_4         | ≥3.75 hours/week                  |
| Moderate physical activity                                           | 4 categories                        | modact_pre_1         | <2.5 hours/week                   |
|                                                                      |                                     | modact_pre_2         | 2.5-4.9 hours/week                |
|                                                                      |                                     | modact_pre_3         | 5-7.4 hours/week                  |
|                                                                      |                                     | modact_pre_4         | ≥7.5 hours/week                   |
| Smoking history                                                      | Indicator                           | smkhx                | Yes/No                            |

**Web Table 2 (continued).** Covariates used to model 10-year risk of all-cause mortality among men with nonmetastatic prostate cancer, Health Professionals Follow-up Study.

| <b>B. Time-varying covariates<sup>a</sup></b>                                                                                               | <b>Modeling as dependent</b>           | <b>Variable name</b> | <b>Functional form as predictor</b> | <b>Category or knot locations</b> |
|---------------------------------------------------------------------------------------------------------------------------------------------|----------------------------------------|----------------------|-------------------------------------|-----------------------------------|
| Period of follow-up                                                                                                                         | Not predicted                          | period               | 5 period indicators                 | N/A                               |
| BMI                                                                                                                                         | Linear (on log scale) <sup>b</sup>     | bmi                  | 4 categories                        | 18.5, 25, 30 kg/m <sup>2</sup>    |
| Vigorous physical activity                                                                                                                  | Logistic, then log-linear <sup>c</sup> | vigact               | Restricted cubic splines, 3 knots   | 1.25, 2.5, 3.75 hours/week        |
| Moderate physical activity                                                                                                                  | Linear <sup>b</sup>                    | modcat               | Restricted cubic splines, 3 knots   | 2.5, 5, 7.5 hours/week            |
| Development of functional impairment, metastasis, myocardial infarction, stroke, congestive heart failure, or amyotrophic lateral sclerosis | Logistic to failure <sup>d</sup>       | xcond                | Indicator and time since switch     | N/A                               |

Abbreviation: BMI, body mass index.

<sup>a</sup> Time-varying covariates were assessed in all periods.

<sup>b</sup> Variables predicted by a linear model were assigned a value equal to the predicted value plus the standard error multiplied by a random number from a Normal (0,1) distribution. Therefore, two subjects with the same risk factor history were not necessarily predicted to have exactly the same risk factor value at the next time point. Simulated values of continuous risk factors were truncated so that they did not fall outside of the observed range.

<sup>c</sup> Variables with many zero values were predicted in two stages. First, we fit a logistic model on an indicator that the variable is nonzero. Second, we fit a linear model for the natural log of the nonzero values. Simulated values were truncated so that they did not fall outside of the observed range.

<sup>d</sup> Variables predicted by a logistic model were assigned a value of 1 if the predicted probability was greater than a random number from a uniform distribution. After the first 1 is generated, the value is set to 1 thereafter.

**Web Table 3.** Cumulative and Average Percent of Men Intervened on Under Strategies in Main Table 2: Estimated Risk<sup>a</sup> of All-Cause Mortality Under Several Hypothetical Physical Activity Strategies Among Men With Nonmetastatic Prostate Cancer, Health Professionals Follow-Up Study. All Strategies Excuse Men From Following the Recommended Physical Activity Levels After Development of Functional Impairment, Metastasis, Myocardial Infarction, Stroke, Congestive Heart Failure, or Amyotrophic Lateral Sclerosis.

| <b>Strategy</b>          | <b>Cumulative % intervened on<sup>b</sup></b> | <b>Average % intervened on<sup>c</sup></b> |
|--------------------------|-----------------------------------------------|--------------------------------------------|
| No intervention          | 0                                             | 0                                          |
| <b>Vigorous activity</b> |                                               |                                            |
| ≥1.25 h/week             | 87                                            | 57                                         |
| ≥2.5 h/week              | 93                                            | 63                                         |
| ≥3.75 h/week             | 97                                            | 72                                         |
| <b>Moderate activity</b> |                                               |                                            |
| ≥2.5 h/week              | 57                                            | 24                                         |
| ≥5 h/week                | 73                                            | 34                                         |
| ≥7.5 h/week              | 85                                            | 45                                         |

<sup>a</sup> Estimates based on the parametric g-formula adjusted for age, parental history of myocardial infarction, primary treatment, clinical stage at diagnosis, Gleason grade at diagnosis, prostate-specific antigen level at diagnosis, smoking history, body mass index, vigorous and moderate physical activity, and the development of functional impairment, metastasis, myocardial infarction, stroke, congestive heart failure, or amyotrophic lateral sclerosis.

<sup>b</sup> Cumulative proportion of men who would have to change their behavior in any time period over follow-up to keep adhering to the strategy.

<sup>c</sup> Average proportion of men who would have to change their behavior in each 2-year period to keep adhering to the strategy.

**Web Table 3 (continued).** Cumulative and Average Percent of Men Intervened on Under Strategies in Main Table 3: Estimated Risk<sup>a</sup> of All-Cause Mortality Under Several Hypothetical Physical Activity Strategies Among Men With Nonmetastatic Prostate Cancer, Health Professionals Follow-Up Study. All Strategies Excuse Men From Following the Recommended Physical Activity Levels After Development of Functional Impairment, Metastasis, or a Serious Chronic Condition.<sup>b</sup>

| <b>Strategy</b>          | <b>Cumulative % intervened on<sup>c</sup></b> | <b>Average % intervened on<sup>d</sup></b> |
|--------------------------|-----------------------------------------------|--------------------------------------------|
| No intervention          | 0                                             | 0                                          |
| <b>Vigorous activity</b> |                                               |                                            |
| ≥1.25 h/week             | 57                                            | 38                                         |
| ≥2.5 h/week              | 62                                            | 42                                         |
| ≥3.75 h/week             | 66                                            | 48                                         |
| <b>Moderate activity</b> |                                               |                                            |
| ≥2.5 h/week              | 37                                            | 16                                         |
| ≥5 h/week                | 48                                            | 23                                         |
| ≥7.5 h/week              | 56                                            | 30                                         |

<sup>a</sup> Estimates based on the parametric g-formula adjusted for age, parental history of myocardial infarction, primary treatment, clinical stage at diagnosis, Gleason grade at diagnosis, prostate-specific antigen level at diagnosis, smoking history, body mass index, vigorous and moderate physical activity, and the development of functional impairment, metastasis, myocardial infarction, stroke, congestive heart failure, or amyotrophic lateral sclerosis.

<sup>b</sup> Myocardial infarction, stroke, congestive heart failure, amyotrophic lateral sclerosis, or any of the following conditions: angina pectoris, pulmonary embolism, heart rhythm disturbance, diabetes, chronic renal failure, rheumatoid arthritis, gout, ulcerative colitis or Crohn's disease, emphysema, Parkinson's disease, and multiple sclerosis.

<sup>c</sup> Cumulative proportion of men who would have to change their behavior in any time period over follow-up to keep adhering to the strategy.

<sup>d</sup> Average proportion of men who would have to change their behavior in each 2-year period to keep adhering to the strategy.

**Web Table 4.** Actual P-values for Results in Main Table 2 per Request of One Reviewer and the Editor: Estimated Risk<sup>a</sup> of All-Cause Mortality Under Several Hypothetical Physical Activity Strategies Among Men With Nonmetastatic Prostate Cancer, Health Professionals Follow-Up Study. All Strategies Excuse Men From Following the Recommended Physical Activity Levels After Development of Functional Impairment, Metastasis, Myocardial Infarction, Stroke, Congestive Heart Failure, or Amyotrophic Lateral Sclerosis.

| Strategy                 | 10-year risk (%) <sup>b</sup> | 95% CI     | Risk ratio | 95% CI     | P-value              | Risk difference (%) | 95% CI     | P-value              |
|--------------------------|-------------------------------|------------|------------|------------|----------------------|---------------------|------------|----------------------|
| No intervention          | 15.4                          | 13.7, 17.4 | 1.0        | --         | --                   | 0                   | --         | --                   |
| <b>Vigorous activity</b> |                               |            |            |            |                      |                     |            |                      |
| ≥1.25 h/week             | 13.0                          | 10.9, 15.4 | 0.84       | 0.75, 0.94 | 0.002                | -2.4                | -3.9, -0.9 | 0.002                |
| ≥2.5 h/week              | 11.1                          | 8.7, 14.1  | 0.72       | 0.58, 0.88 | 0.002                | -4.3                | -6.6, -1.8 | 5 x 10 <sup>-4</sup> |
| ≥3.75 h/week             | 10.5                          | 8.0, 13.5  | 0.68       | 0.53, 0.85 | 0.001                | -5.0                | -7.3, -2.3 | 1 x 10 <sup>-4</sup> |
| <b>Moderate activity</b> |                               |            |            |            |                      |                     |            |                      |
| ≥2.5 h/week              | 13.9                          | 12.0, 16.0 | 0.90       | 0.84, 0.94 | 3 x 10 <sup>-4</sup> | -1.6                | -2.4, -0.9 | 3 x 10 <sup>-5</sup> |
| ≥5 h/week                | 12.6                          | 10.6, 14.7 | 0.81       | 0.73, 0.88 | 1 x 10 <sup>-5</sup> | -2.9                | -4.2, -1.8 | 3 x 10 <sup>-6</sup> |
| ≥7.5 h/week              | 12.2                          | 10.3, 14.4 | 0.79       | 0.71, 0.86 | 2 x 10 <sup>-6</sup> | -3.2                | -4.5, -2.1 | 3 x 10 <sup>-7</sup> |

Abbreviation: CI, confidence interval.

<sup>a</sup> Estimates based on the parametric g-formula adjusted for age, parental history of myocardial infarction, primary treatment, clinical stage at diagnosis, Gleason grade at diagnosis, prostate-specific antigen level at diagnosis, smoking history, body mass index, vigorous and moderate physical activity, and the development of functional impairment, metastasis, myocardial infarction, stroke, congestive heart failure, or amyotrophic lateral sclerosis.

<sup>b</sup> The observed risk was 15.4%. There were 250 observed deaths among 2,299 men over 8,972 person-years of follow-up. Risk under no intervention (*i.e.* the natural course) is the referent.



**Web Table 5.** Actual P-values for Results in Main Table 3 per Request of One Reviewer and the Editor: Estimated Risk<sup>a</sup> of All-Cause Mortality Under Several Hypothetical Physical Activity Strategies Among Men With Nonmetastatic Prostate Cancer, Health Professionals Follow-Up Study. All Strategies Excuse Men From Following the Recommended Physical Activity Levels After Development of Functional Impairment, Metastasis, or a Serious Chronic Condition.<sup>b</sup>

| Strategy                 | 10-year risk (%) <sup>c</sup> | 95% CI     | Risk ratio | 95% CI     | P-value              | Risk difference (%) | 95% CI     | P-value              |
|--------------------------|-------------------------------|------------|------------|------------|----------------------|---------------------|------------|----------------------|
| No intervention          | 15.5                          | 13.8, 17.4 | 1.0        | --         | --                   | 0                   | --         | --                   |
| <b>Vigorous activity</b> |                               |            |            |            |                      |                     |            |                      |
| ≥1.25 h/week             | 14.2                          | 12.4, 16.2 | 0.92       | 0.85, 0.97 | 0.01                 | -1.3                | -2.3, -0.5 | 0.005                |
| ≥2.5 h/week              | 13.1                          | 11.2, 15.3 | 0.84       | 0.75, 0.93 | 0.001                | -2.4                | -3.9, -1.0 | 0.001                |
| ≥3.75 h/week             | 12.8                          | 10.9, 14.9 | 0.83       | 0.72, 0.92 | 0.003                | -2.7                | -4.4, -1.2 | 0.001                |
| <b>Moderate activity</b> |                               |            |            |            |                      |                     |            |                      |
| ≥2.5 h/week              | 14.3                          | 12.7, 16.4 | 0.93       | 0.89, 0.96 | 2 x 10 <sup>-4</sup> | -1.1                | -1.6, -0.6 | 2 x 10 <sup>-5</sup> |
| ≥5 h/week                | 13.7                          | 11.9, 15.6 | 0.89       | 0.83, 0.92 | 1 x 10 <sup>-5</sup> | -1.8                | -2.7, -1.2 | 3 x 10 <sup>-6</sup> |
| ≥7.5 h/week              | 13.4                          | 11.8, 15.5 | 0.87       | 0.81, 0.91 | 4 x 10 <sup>-6</sup> | -2.1                | -2.9, -1.3 | 4 x 10 <sup>-7</sup> |

Abbreviation: CI, confidence interval.

<sup>a</sup> Estimates based on the parametric g-formula adjusted for age, parental history of myocardial infarction, primary treatment, clinical stage at diagnosis, Gleason grade at diagnosis, prostate-specific antigen level at diagnosis, smoking history, body mass index, vigorous and moderate physical activity, and the development of functional impairment, metastasis, myocardial infarction, stroke, congestive heart failure, or amyotrophic lateral sclerosis.

<sup>b</sup> Myocardial infarction, stroke, congestive heart failure, amyotrophic lateral sclerosis, or any of the following conditions: angina pectoris, pulmonary embolism, heart rhythm disturbance, diabetes, chronic renal failure, rheumatoid arthritis, gout, ulcerative colitis or Crohn's disease, emphysema, Parkinson's disease, and multiple sclerosis.

<sup>c</sup> The observed risk was 15.4%. There were 250 observed deaths among 2,299 men over 8,972 person-years of follow-up. Risk under no intervention (*i.e.* the natural course) is the referent.

**Web Table 6.** Estimated Survival Time<sup>a</sup> and Time Invested<sup>b</sup> in Physical Activity Over 10 Years Under Each Hypothetical Strategy Among Men With Nonmetastatic Prostate Cancer, Health Professionals Follow-Up Study.

| Strategy                 | Average number of days (months) lived | Average number of days (months) lived, difference | Average number of days (months) invested in physical activity | Average number of days (months) invested in physical activity, difference |
|--------------------------|---------------------------------------|---------------------------------------------------|---------------------------------------------------------------|---------------------------------------------------------------------------|
| No intervention          | 3,408 (113.6)                         | 0                                                 | 35 (1.2) (vigorous)<br>180 (6.0) (moderate)                   | 0                                                                         |
| <b>Vigorous activity</b> |                                       |                                                   |                                                               |                                                                           |
| 1.25 h/week              | 3,448 (114.9)                         | 40 (1.3)                                          | 56 (1.9)                                                      | 21 (0.7)                                                                  |
| 2.5 h/week               | 3,479 (116.0)                         | 71 (2.4)                                          | 81 (2.7)                                                      | 46 (1.5)                                                                  |
| 3.75 h/week              | 3,489 (116.3)                         | 81 (2.7)                                          | 103 (3.4)                                                     | 67 (2.2)                                                                  |
| <b>Moderate activity</b> |                                       |                                                   |                                                               |                                                                           |
| 2.5 h/week               | 3,435 (114.5)                         | 27 (0.9)                                          | 194 (6.5)                                                     | 14 (0.5)                                                                  |
| 5 h/week                 | 3,458 (115.3)                         | 50 (1.7)                                          | 216 (7.2)                                                     | 36 (1.2)                                                                  |
| 7.5 h/week               | 3,463 (115.4)                         | 55 (1.8)                                          | 243 (8.1)                                                     | 63 (2.1)                                                                  |

<sup>a</sup> Average number of days lived calculated as restricted mean survival time under each strategy. Difference in average number of days lived calculated as the difference in restricted mean survival time comparing the specified strategy with no intervention (*i.e.* the natural course).

<sup>b</sup> Average number of days invested in strategy-specific (*i.e.* vigorous or moderate) physical activity over follow-up. Difference in average number of days invested in physical activity calculated as the difference in average number of days invested in physical activity comparing the specified strategy with no intervention. Differences were calculated based on values before rounding.

**Web Table 7.** Sensitivity Analysis Using a Negative Outcome Control: Estimated Risk<sup>a</sup> of Questionnaire Non-Response Under Several Hypothetical Physical Activity Strategies Among Men With Nonmetastatic Prostate Cancer, Health Professionals Follow-Up Study. All Strategies Excuse Men From Following the Recommended Physical Activity Levels After Development of Functional Impairment, Metastasis, Myocardial Infarction, Stroke, Congestive Heart Failure, or Amyotrophic Lateral Sclerosis.

| Strategy                 | 10-year risk (%) <sup>b</sup> | 95% CI     | Risk ratio | 95% CI     | Risk difference | 95% CI     | Cumulative % intervened on <sup>c</sup> | Average % intervened on <sup>d</sup> |
|--------------------------|-------------------------------|------------|------------|------------|-----------------|------------|-----------------------------------------|--------------------------------------|
| No intervention          | 12.8                          | 11.2, 14.7 | 1.0        | --         | 0               | --         | 0                                       | 0                                    |
| <b>Vigorous activity</b> |                               |            |            |            |                 |            |                                         |                                      |
| ≥1.25 h/week             | 13.5                          | 11.2, 15.8 | 1.05       | 0.93, 1.17 | 0.7             | -0.8, 2.1  | 87                                      | 57                                   |
| ≥2.5 h/week              | 13.5                          | 10.5, 16.9 | 1.05       | 0.86, 1.30 | 0.7             | -1.7, 3.7  | 93                                      | 63                                   |
| ≥3.75 h/week             | 12.6                          | 9.7, 15.9  | 0.98       | 0.79, 1.22 | -0.2            | -2.7, 2.9  | 97                                      | 72                                   |
| <b>Moderate activity</b> |                               |            |            |            |                 |            |                                         |                                      |
| ≥2.5 h/week              | 12.3                          | 10.5, 14.1 | 0.96       | 0.91, 0.99 | -0.5            | -1.2, -0.1 | 57                                      | 24                                   |
| ≥5 h/week                | 11.7                          | 9.9, 13.8  | 0.92       | 0.83, 0.99 | -1.1            | -2.1, -0.2 | 73                                      | 34                                   |
| ≥7.5 h/week              | 11.8                          | 9.9, 13.9  | 0.92       | 0.83, 0.99 | -1.0            | -2.1, -0.1 | 85                                      | 45                                   |

Abbreviation: CI, confidence interval.

<sup>a</sup> Estimates based on the parametric g-formula adjusted for age, parental history of myocardial infarction, primary treatment, clinical stage at diagnosis, Gleason grade at diagnosis, prostate-specific antigen level at diagnosis, smoking history, body mass index, vigorous and moderate physical activity, and the development of metastasis, myocardial infarction, stroke, congestive heart failure, amyotrophic lateral sclerosis, or functional impairment.

<sup>b</sup> The observed risk was 12.7%. There were 205 events among 2,299 men over 8,927 person-years of follow-up.

<sup>c</sup> Cumulative proportion of men who would have to change their behavior in any time period over follow-up to keep adhering to the strategy.

<sup>d</sup> Average proportion of men who would have to change their behavior in each 2-year period to keep adhering to the strategy.

**Web Table 8.** Same as Main Table 2 Except Assuming That the Development of Functional Impairment, Metastasis, and Chronic Diseases Occurred Two Years Before the Questionnaire in Which These Conditions Were Reported. This Involved Excluding Those Developing These Conditions Through the End of the First Period and Stopping the Interventions in the Period Before (Rather Than After) Any of These Conditions Were Reported to Have Developed Over Follow-Up: Estimated Risk<sup>a</sup> of All-Cause Mortality Under Several Hypothetical Physical Activity Strategies Among Men With Nonmetastatic Prostate Cancer, Health Professionals Follow-Up Study.

| Strategy                 | 10-year risk (%) <sup>b</sup> | 95% CI     | Risk ratio | 95% CI     | Risk difference | 95% CI     | Cumulative % intervened on <sup>c</sup> | Average % intervened on <sup>d</sup> |
|--------------------------|-------------------------------|------------|------------|------------|-----------------|------------|-----------------------------------------|--------------------------------------|
| No intervention          | 13.7                          | 12.0, 15.8 | 1.0        | --         | 0               | --         | 0                                       | 0                                    |
| <b>Vigorous activity</b> |                               |            |            |            |                 |            |                                         |                                      |
| ≥1.25 h/week             | 11.5                          | 9.6, 13.9  | 0.83       | 0.73, 0.95 | -2.3            | -3.8, -0.7 | 86                                      | 56                                   |
| ≥2.5 h/week              | 9.7                           | 7.4, 12.8  | 0.71       | 0.55, 0.88 | -4.0            | -6.2, -1.6 | 93                                      | 61                                   |
| ≥3.75 h/week             | 9.2                           | 7.0, 12.4  | 0.67       | 0.52, 0.86 | -4.5            | -6.9, -1.9 | 97                                      | 71                                   |
| <b>Moderate activity</b> |                               |            |            |            |                 |            |                                         |                                      |
| ≥2.5 h/week              | 12.1                          | 10.4, 14.2 | 0.88       | 0.83, 0.94 | -1.6            | -2.5, -0.8 | 58                                      | 24                                   |
| ≥5 h/week                | 11.1                          | 9.2, 13.3  | 0.81       | 0.71, 0.90 | -2.7            | -4.0, -1.5 | 74                                      | 34                                   |
| ≥7.5 h/week              | 11.0                          | 9.0, 13.1  | 0.80       | 0.70, 0.89 | -2.7            | -4.2, -1.6 | 85                                      | 44                                   |

Abbreviation: CI, confidence interval.

<sup>a</sup> Estimates based on the parametric g-formula adjusted for age, parental history of myocardial infarction, primary treatment, clinical stage at diagnosis, Gleason grade at diagnosis, prostate-specific antigen level at diagnosis, smoking history, body mass index, vigorous and moderate physical activity, and the development of functional impairment, metastasis, myocardial infarction, stroke, congestive heart failure, or amyotrophic lateral sclerosis.

<sup>b</sup> The observed risk was 14.0%. There were 209 observed deaths among 2,149 men over 8,431 person-years of follow-up.

<sup>c</sup> Cumulative proportion of men who would have to change their behavior in any time period over follow-up to keep adhering to the strategy.

<sup>d</sup> Average proportion of men who would have to change their behavior in each 2-year period to keep adhering to the strategy.

**Web Table 9.** Same as Main Table 2 Except That Total Time Devoted to Vigorous and Moderate Physical Activity Was Kept Constant: Estimated Risk<sup>a</sup> of All-Cause Mortality Under Several Hypothetical Physical Activity Strategies Among Men With Nonmetastatic Prostate Cancer, Health Professionals Follow-Up Study. All Strategies Excuse Men From Following the Recommended Physical Activity Levels After Development of Functional Impairment, Metastasis, Myocardial Infarction, Stroke, Congestive Heart Failure, or Amyotrophic Lateral Sclerosis.

| <b>Strategy</b>          | <b>10-year risk (%)<sup>b</sup></b> | <b>95% CI</b> | <b>Risk ratio</b> | <b>95% CI</b> | <b>Risk difference</b> | <b>95% CI</b> | <b>Cumulative % intervened on<sup>c</sup></b> | <b>Average % intervened on<sup>d</sup></b> |
|--------------------------|-------------------------------------|---------------|-------------------|---------------|------------------------|---------------|-----------------------------------------------|--------------------------------------------|
| No intervention          | 15.4                                | 13.7, 17.4    | 1.0               | --            | 0                      | --            | 0                                             | 0                                          |
| <b>Vigorous activity</b> |                                     |               |                   |               |                        |               |                                               |                                            |
| ≥1.25 h/week             | 13.4                                | 11.4, 15.9    | 0.87              | 0.77, 0.98    | -2.1                   | -3.5, -0.3    | 87                                            | 56                                         |
| ≥2.5 h/week              | 11.9                                | 9.3, 15.0     | 0.77              | 0.62, 0.95    | -3.5                   | -6.0, -0.7    | 93                                            | 63                                         |
| ≥3.75 h/week             | 11.9                                | 9.1, 15.0     | 0.77              | 0.59, 0.96    | -3.6                   | -6.2, -0.6    | 97                                            | 72                                         |
| <b>Moderate activity</b> |                                     |               |                   |               |                        |               |                                               |                                            |
| ≥2.5 h/week              | 14.4                                | 12.4, 16.5    | 0.93              | 0.87, 0.97    | -1.1                   | -2.1, -0.4    | 56                                            | 23                                         |
| ≥5 h/week                | 13.2                                | 11.0, 15.5    | 0.86              | 0.76, 0.92    | -2.2                   | -3.7, -1.2    | 74                                            | 34                                         |
| ≥7.5 h/week              | 13.1                                | 10.8, 15.6    | 0.85              | 0.75, 0.92    | -2.4                   | -3.9, -1.2    | 85                                            | 45                                         |

Abbreviation: CI, confidence interval.

<sup>a</sup> Estimates based on the parametric g-formula adjusted for age, parental history of myocardial infarction, primary treatment, clinical stage at diagnosis, Gleason grade at diagnosis, prostate-specific antigen level at diagnosis, smoking history, body mass index, vigorous and moderate physical activity, and the development of functional impairment, metastasis, myocardial infarction, stroke, congestive heart failure, or amyotrophic lateral sclerosis.

<sup>b</sup> The observed risk was 15.4%. There were 250 observed deaths among 2,299 men over 8,972 person-years of follow-up.

<sup>c</sup> Cumulative proportion of men who would have to change their behavior in any time period over follow-up to keep adhering to the strategy.

<sup>d</sup> Average proportion of men who would have to change their behavior in each 2-year period to keep adhering to the strategy.

**Web Table 10.** Same as Main Table 2 Except That a Two-Year Lag Time Was Imposed: Estimated Risk<sup>a</sup> of All-Cause Mortality Under Several Hypothetical Physical Activity Strategies Among Men With Nonmetastatic Prostate Cancer, Health Professionals Follow-Up Study. All Strategies Excuse Men From Following the Recommended Physical Activity Levels After Development of Functional Impairment, Metastasis, Myocardial Infarction, Stroke, Congestive Heart Failure, or Amyotrophic Lateral Sclerosis.

| <b>Strategy</b>          | <b>10-year risk (%)<sup>b</sup></b> | <b>95% CI</b> | <b>Risk ratio</b> | <b>95% CI</b> | <b>Risk difference</b> | <b>95% CI</b> | <b>Cumulative % intervened on<sup>c</sup></b> | <b>Average % intervened on<sup>d</sup></b> |
|--------------------------|-------------------------------------|---------------|-------------------|---------------|------------------------|---------------|-----------------------------------------------|--------------------------------------------|
| No intervention          | 15.6                                | 13.7, 17.5    | 1.0               | --            | 0                      | --            | 0                                             | 0                                          |
| <b>Vigorous activity</b> |                                     |               |                   |               |                        |               |                                               |                                            |
| ≥1.25 h/week             | 13.3                                | 11.5, 15.5    | 0.85              | 0.77, 0.94    | -2.4                   | -3.7, -0.9    | 78                                            | 53                                         |
| ≥2.5 h/week              | 11.7                                | 9.7, 14.3     | 0.75              | 0.63, 0.89    | -3.9                   | -6.0, -1.7    | 85                                            | 59                                         |
| ≥3.75 h/week             | 11.5                                | 9.3, 14.1     | 0.74              | 0.61, 0.88    | -4.1                   | -6.3, -1.8    | 90                                            | 68                                         |
| <b>Moderate activity</b> |                                     |               |                   |               |                        |               |                                               |                                            |
| ≥2.5 h/week              | 14.8                                | 12.7, 16.7    | 0.95              | 0.90, 0.99    | -0.8                   | -1.6, -0.2    | 48                                            | 22                                         |
| ≥5 h/week                | 14.0                                | 11.6, 16.0    | 0.89              | 0.82, 0.96    | -1.7                   | -2.9, -0.5    | 64                                            | 31                                         |
| ≥7.5 h/week              | 13.8                                | 11.3, 15.9    | 0.89              | 0.80, 0.96    | -1.8                   | -3.1, -0.7    | 76                                            | 42                                         |

Abbreviation: CI, confidence interval.

<sup>a</sup> Estimates based on the parametric g-formula adjusted for age, parental history of myocardial infarction, primary treatment, clinical stage at diagnosis, Gleason grade at diagnosis, prostate-specific antigen level at diagnosis, smoking history, body mass index, vigorous and moderate physical activity, and the development of functional impairment, metastasis, myocardial infarction, stroke, congestive heart failure, or amyotrophic lateral sclerosis.

<sup>b</sup> The observed risk was 15.4%. There were 250 observed deaths among 2,299 men over 8,972 person-years of follow-up.

<sup>c</sup> Cumulative proportion of men who would have to change their behavior in any time period over follow-up to keep adhering to the strategy.

<sup>d</sup> Average proportion of men who would have to change their behavior in each 2-year period to keep adhering to the strategy.

**Web Table 11.** Estimated Odds Ratios<sup>a</sup> for All-Cause Mortality in Two-Year Intervals by Duration of Weekly Physical Activity Cancer Among Men With Nonmetastatic Prostate Cancer, Health Professionals Follow-Up Study.

|                                 | Vigorous activity (hours/week) |                      |                      |                      | Moderate activity (hours/week) |                      |                      |                      |
|---------------------------------|--------------------------------|----------------------|----------------------|----------------------|--------------------------------|----------------------|----------------------|----------------------|
|                                 | <1.25                          | 1.25 to <2.5         | 2.5 to <3.75         | ≥3.75                | <2.5                           | 2.5 to <5            | 5 to <7.5            | ≥7.5                 |
| Cases                           | 201                            | 15                   | 17                   | 17                   | 125                            | 41                   | 30                   | 54                   |
| Person-years                    | 5,706                          | 841                  | 1,058                | 1,367                | 2,442                          | 1,763                | 1,536                | 3,231                |
| Age-adjusted OR (95% CI)        | 1                              | 0.61<br>(0.36, 1.04) | 0.61<br>(0.37, 1.01) | 0.51<br>(0.30, 0.84) | 1                              | 0.54<br>(0.37, 0.77) | 0.46<br>(0.30, 0.69) | 0.40<br>(0.28, 0.55) |
| +pre-baseline physical activity | 1                              | 0.60<br>(0.35, 1.04) | 0.60<br>(0.35, 1.01) | 0.53<br>(0.30, 0.92) | 1                              | 0.52<br>(0.36, 0.75) | 0.44<br>(0.29, 0.68) | 0.38<br>(0.26, 0.54) |
| +baseline covariates            | 1                              | 0.58<br>(0.34, 1.01) | 0.62<br>(0.37, 1.04) | 0.52<br>(0.30, 0.91) | 1                              | 0.51<br>(0.35, 0.74) | 0.44<br>(0.29, 0.67) | 0.39<br>(0.27, 0.56) |
| +simple update covariates       | 1                              | 0.57<br>(0.33, 0.99) | 0.62<br>(0.37, 1.05) | 0.52<br>(0.30, 0.92) | 1                              | 0.52<br>(0.36, 0.75) | 0.44<br>(0.29, 0.67) | 0.38<br>(0.26, 0.54) |
| +intermediate diagnoses         | 1                              | 0.59<br>(0.34, 1.03) | 0.62<br>(0.36, 1.05) | 0.56<br>(0.32, 0.99) | 1                              | 0.60<br>(0.41, 0.88) | 0.47<br>(0.31, 0.73) | 0.44<br>(0.30, 0.63) |

Abbreviations: CI, confidence interval; OR, odds ratio.

<sup>a</sup> Estimates based on pooled logistic regression models updating physical activity each time period. Vigorous and moderate physical activity were mutually adjusted. To age-adjusted models (containing linear and quadratic terms for age), we sequentially added the following adjustment variables: pre-baseline physical activity, baseline covariates, simple update covariates, and intermediate diagnoses. Pre-baseline physical activity included vigorous and moderate activity. Baseline covariates included parental history of myocardial infarction, primary treatment, clinical stage at diagnosis, Gleason grade at diagnosis, prostate-specific antigen level at diagnosis, smoking history, pre-baseline body mass index. Simple update covariates included body mass index. Intermediate diagnoses included the development of functional impairment, metastasis, myocardial infarction, stroke, congestive heart failure, or amyotrophic lateral sclerosis.

**Web Table 12.** Same as Main Table 2 but With Low Levels of Physical Activity as the Reference: Estimated Risk<sup>a</sup> of All-Cause Mortality Under Several Hypothetical Physical Activity Strategies Among Men With Nonmetastatic Prostate Cancer, Health Professionals Follow-Up Study. All Strategies Excuse Men From Following the Recommended Physical Activity Levels After Development of Functional Impairment, Metastasis, Myocardial Infarction, Stroke, Congestive Heart Failure, or Amyotrophic Lateral Sclerosis.

| Strategy                 | 10-year risk (%) <sup>b</sup> | 95% CI     | Risk ratio | 95% CI     |
|--------------------------|-------------------------------|------------|------------|------------|
| <b>Vigorous activity</b> |                               |            |            |            |
| <1.25 h/week             | 16.7                          | 14.6, 18.8 | 1.0        | --         |
| ≥1.25 h/week             | 13.0                          | 10.9, 15.4 | 0.78       | 0.68, 0.91 |
| ≥2.5 h/week              | 11.1                          | 8.7, 14.1  | 0.66       | 0.52, 0.85 |
| ≥3.75 h/week             | 10.5                          | 8.0, 13.5  | 0.62       | 0.48, 0.83 |
| <b>Moderate activity</b> |                               |            |            |            |
| <2.5 h/week              | 19.8                          | 17.4, 22.4 | 1.0        | --         |
| ≥2.5 h/week              | 13.9                          | 12.0, 16.0 | 0.70       | 0.62, 0.79 |
| ≥5 h/week                | 12.6                          | 10.6, 14.7 | 0.63       | 0.54, 0.74 |
| ≥7.5 h/week              | 12.2                          | 10.3, 14.4 | 0.62       | 0.51, 0.72 |

Abbreviation: CI, confidence interval.

<sup>a</sup> Estimates based on the parametric g-formula adjusted for age, parental history of myocardial infarction, primary treatment, clinical stage at diagnosis, Gleason grade at diagnosis, prostate-specific antigen level at diagnosis, smoking history, body mass index, vigorous and moderate physical activity, and the development of functional impairment, metastasis, myocardial infarction, stroke, congestive heart failure, or amyotrophic lateral sclerosis.

<sup>b</sup> The observed risk was 15.4%. There were 250 observed deaths among 2,299 men over 8,972 person-years of follow-up.



**Web Figure 1.** Mean differences between observed and simulated values for body mass index and their 95% confidence intervals by year of follow-up. Differences were never greater than 0.04%.

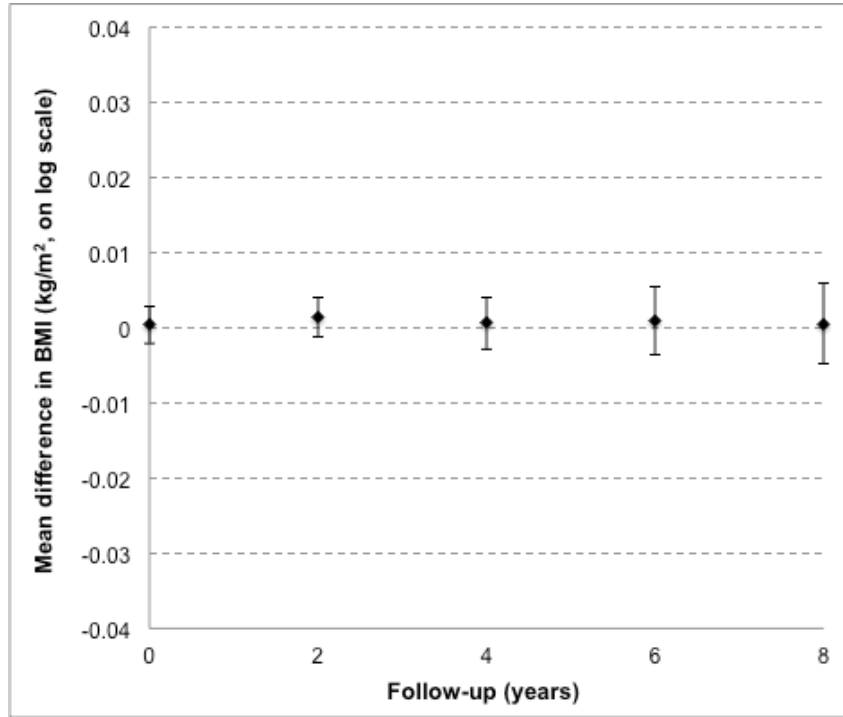

**Web Figure 2.** Mean differences between observed and simulated values for moderate activity and their 95% confidence intervals by year of follow-up. Differences were never greater than 16%.

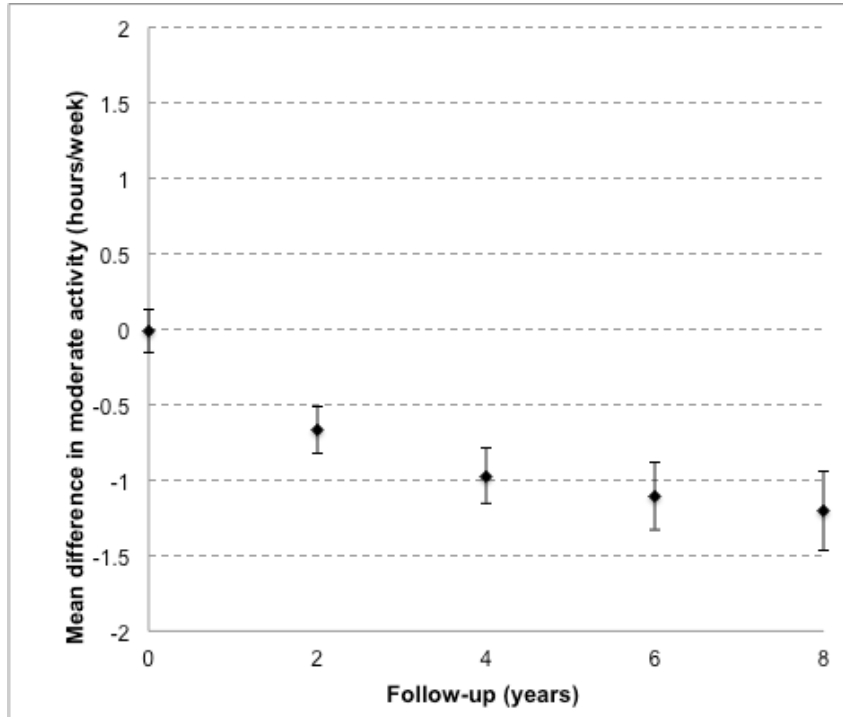

**Web Figure 3.** Mean differences between observed and simulated values for vigorous activity and their 95% confidence intervals by year of follow-up. Differences were never greater than 5%.

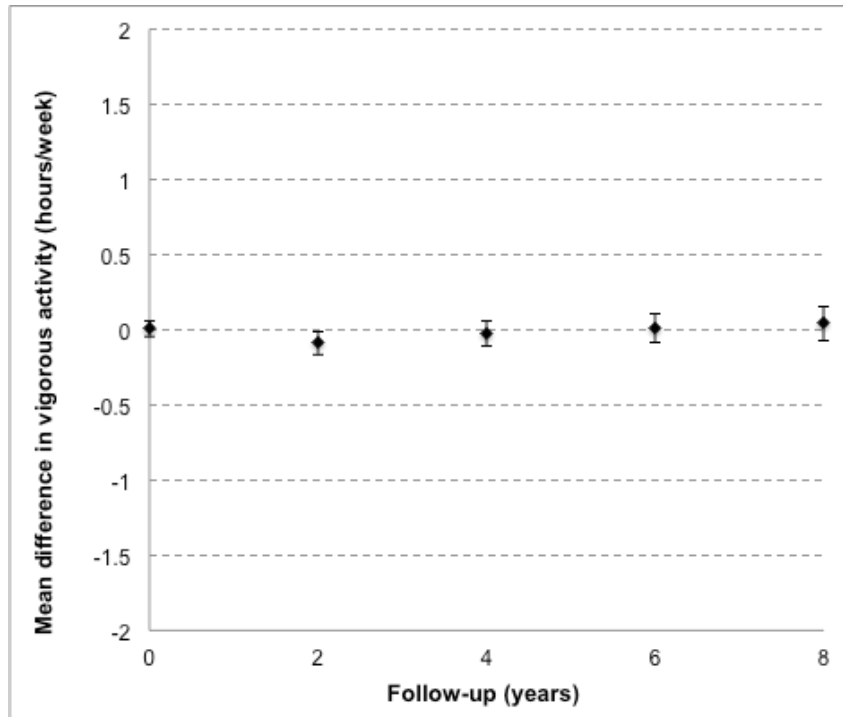

**Web Figure 4.** Mean differences between observed and simulated values for an indicator of conditions limiting physical ability (functional impairment, metastasis, myocardial infarction, stroke, congestive heart failure, amyotrophic lateral sclerosis) and their 95% confidence intervals by year of follow-up. Differences were never greater than 15%.

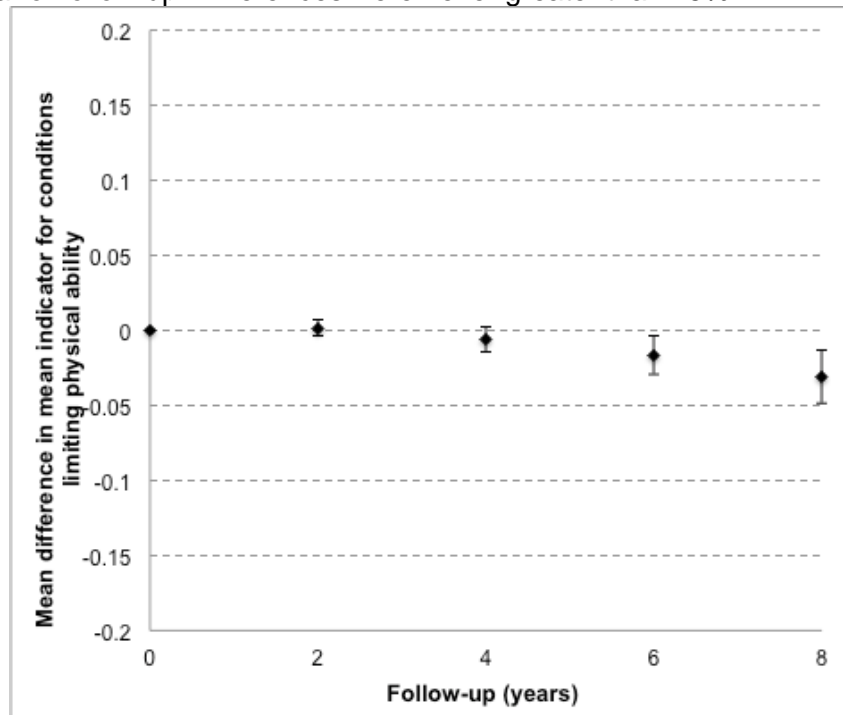

Supplement: kwy261_dickerman_web_material_final.pdf [file kwy261_dickerman_web_material_final.pdf]
